# Supplementary material
Source: Research Square preprint supplement (doi:10.21203/rs.3.rs-8340431/v1)
Supplement: Supplementary file 1 [file 5929267ce17bc4b9599d8844.xlsx]

## Sheet: Fig. 1c
	RBOX Fermentation			Fermentation Deficient			Fermentation Deficient + FadAB			Fermentation Deficient + TER_ACR
0	0.05	0.05	0.05	0.05	0.05	0.05	0.05	0.05	0.05	0.05	0.05	0.05
21	0.178	0.179	0.158	0.084	0.091	0.088	0.069	0.061	0.067	0.053	0.038	0.062
45	0.365	0.248	0.308	0.075	0.073	0.079	0.068	0.059	0.068	0.062	0.029	0.048
73	0.35	0.305	0.413	0.078	0.082	0.08	0.074	0.11	0.092	0.064	0.026	0.053

## Sheet: Fig. 2a
	Starting Strain									Round 6									Round 12									Round 18
							0.0684206	0.0855266	0.0876856	0.0989817	0.112413	0.108825	0.118209	0.0949076	0.116448	0.0922715	0.0958377	0.106562	0.0691514	0.0818401	0.111004	0.176863	0.176337	0.0785295	0.127389	0.15599	0.144278	0.136031	0.137866	0.137413	0.121729	0.137866	0.153099	0.176043	0.175984	0.173818

## Sheet: Fig. 2b
	octanol			decanol			dodecanol			tetradecanol			hexadecanol
	mean	S.D.	N	mean	S.D.	N	mean	S.D.	N	mean	S.D.	N	mean	S.D.	N
starting strain	6.27318	1.38205	3	38.7342	14.7922	3	122.772	56.2161	3	221.461	101.799	3	13.5882	7.4961	3
round 6	8.24264	2.06036	9	66.6793	23.4323	9	187.666	63.6067	9	338.91	93.1558	9	22.2406	6.07439	9
round 12	14.6319	4.82107	9	86.1286	23.5356	9	174.534	50.3222	9	241.076	98.7891	9	13.7396	7.02292	9
round 18	15.803	1.78215	9	91.4043	12.6222	9	187.812	38.5009	9	240.608	83.5288	9	13.4335	6.01526	9

## Sheet: Fig. 2c
	octanol			decanol			dodecanol			tetradecanol			hexadecanol
	mean	S.D.	N	mean	S.D.	N	mean	S.D.	N	mean	S.D.	N	mean	S.D.	N
starting strain	13.5856	4.87976	3	77.7404	10.0233	3	237.143	3.71738	3	427.252	4.60785	3	25.198	3.89535	3
round 6	11.1263	2.33007	9	86.3289	8.67413	9	241.761	17.9838	9	446.1	43.2065	9	29.6642	5.07542	9
round 12	23.4713	9.04111	9	139.012	51.1438	9	268.622	34.9226	9	359.949	65.4457	9	20.4652	7.28267	9
round 18	21.9581	5.94934	9	128.06	40.4293	9	250.689	28.1451	9	306.472	33.8243	9	16.7315	4.48864	9

## Sheet: Fig. 3a
		max productivity (g/L/hr)
starting strain		0.0272994	0.0259542
CM15-TFAE2R18		0.114138	0.114358

## Sheet: Fig. 3b
Timepoint	Evol 1	Evol 2	Starter 1	Starter 2
0	0.00113426	0.00120098	0.00112797	0.00092558
3	0.00963681	0.0155181	0.0026366	0.00087541
16	1.49343	0.801534	0.133651	0.215647
19	1.73578	1.14461	0.215549	0.293509
24	2.23695	1.35719	0.24117	0.321351
43	2.73423	1.94893	0.415932	0.65016
49	2.6389	2.28609	0.445703	0.753143
64	2.44646	1.76985	0.514879	0.858306
73	2.54093	1.91947	0.544713	0.941227
88	2.48954	1.83748	0.60044	0.773887

## Sheet: Fig. 3c
Time (hr)	Evol 1	Evol 2	Starter 1	Starter 2
0	0.07	0.06	0.08	0.06
3	0.17	0.1	0.05	0.04
16	1.58	0.51	0.16	0.33
19	1.94	0.71	0.16	0.32
21	2.23	0.66	0.16	0.48
24	2.25	0.88	0.18	0.46
40	2.23	1.64	0.27	0.77
43	1.93	1.56	0.33	0.73
46	1.81	1.21	0.28	0.76
49	1.79	1.13	0.28	0.94
64	1.97	1.27	0.63	1.07
67	1.87	1.08	0.48	1.05
70	1.92	1.04	0.43	1.04
73	1.85	1.09	0.47	1.07
88	1.75	1.07	0.52	0.93

## Sheet: Fig. 4b
	wt			-35 A→G			-10 T→C			-35 C→T
	mean	S.D.	N	mean	S.D.	N	mean	S.D.	N	mean	S.D.	N
% proteome	12.6525	0.663338	3	5.7133	0.2564	12	5.7965	0.1286	12	10.3116	0.859709	3

## Sheet: Fig. 4c 6PGD
	average initial growth rate		starter			round 6			round 12			round 18
Starter B	0.0621	0.00130354	0.589186	0.095517	3
1R6	0.0753	0.0048823				0.336159	0.023843	3
2R6	0.0647	0.0106727				0.549077	0.037641	3
3R6	0.0782	0.00339983				0.44753	0.051564	3
1R12	0.0718	0.00363399							0.468208	0.065045	3
2R12	0.1587	0.00343809							0.290559	0.053034	3
3R12	0.1156	0.00305313							0.379454	0.055203	3
3R18	0.1122	0.00287231										0.450496	0.088693	3
1R18	0.1065	0.00379275										0.284254	0.048032	3
2R18	0.1644	0.0037772										0.224125	0.033659	3

## Sheet: Fig 4c. GAPDH 
	average initial growth rate		starter			round 6			round 12			round 18
Starter B	0.0621	0.00130354	0.361333	0.144838	3
1R6	0.0753	0.0048823				0.251353	0.069585	3
2R6	0.0647	0.0106727				0.571683	0.040655	3
3R6	0.0782	0.00339983				0.481908	0.12038	3
1R12	0.0718	0.00363399							1.21381	0.170902	3
2R12	0.1587	0.00343809							1.19095	0.139189	3
3R12	0.1156	0.00305313							1.18635	0.197946	3
3R18	0.1122	0.00287231										1.18769	0.010785	3
1R18	0.1065	0.00379275										0.754574	0.06912	3
2R18	0.1644	0.0037772										1.60927	0.139235	3

[truncated: 21 more sheets: Fig 4d HycE, Fig. 4d FldA, Fig. 4d HyaB, Fig 4e YqhD, Fig. 4e AtoB, Fig. 4f TER, Fig. 4f FadB, Supp. Fig. 1 a, Supp. Fig. 1b, Supp. Fig 1c , Supp. Fig. 2a, Supp. Fig. 2b, Supp. Fig 2c, Supp. Fig. 2d, Supp. Fig 4a_x0009_, Supp. Fig 4c, Supp. Fig. 5, Supp. Fig 6a, Supp. Fig. 6b, Supp. Fig 7a …]
